# Supplementary material for: Effect of a Prize-Linked Savings Intervention on Savings and Healthy Behaviors Among Men in Kenya: A Randomized Clinical Trial
Source: PubMed Central journal article supplement (PMC6745050; doi:10.1001/jamanetworkopen.2019.11162), 2019-09-13
Supplement: jamanetwopen-2-e1911162-s003.pdf [file jamanetwopen-2-e1911162-s003.pdf]

## Data Sharing Statement

Moscoe. Effect of a Prize-Linked Savings Intervention on Savings and Healthy Behaviors Among Men in Kenya. *JAMA Netw Open*. Published September 13, 2019. 10.1001/jamanetworkopen.2019.11162

### Data

**Data available:** Yes

**Data types:** Deidentified participant data

**How to access data:** Data set will be uploaded to <https://dataverse.harvard.edu/>

**When available:** With publication

### Supporting Documents

**Document types:** None

### Additional Information

**Who can access the data:** Anyone requesting the data

**Types of analyses:** For any purpose

**Mechanisms of data availability:** Data will be available to download without restriction
